# Supplementary material
Source: MDPI journal article supplement (https://www.mdpi.com/2073-445X/12/1/250)

**Figure S1. Externalization of Spatial Variables.**

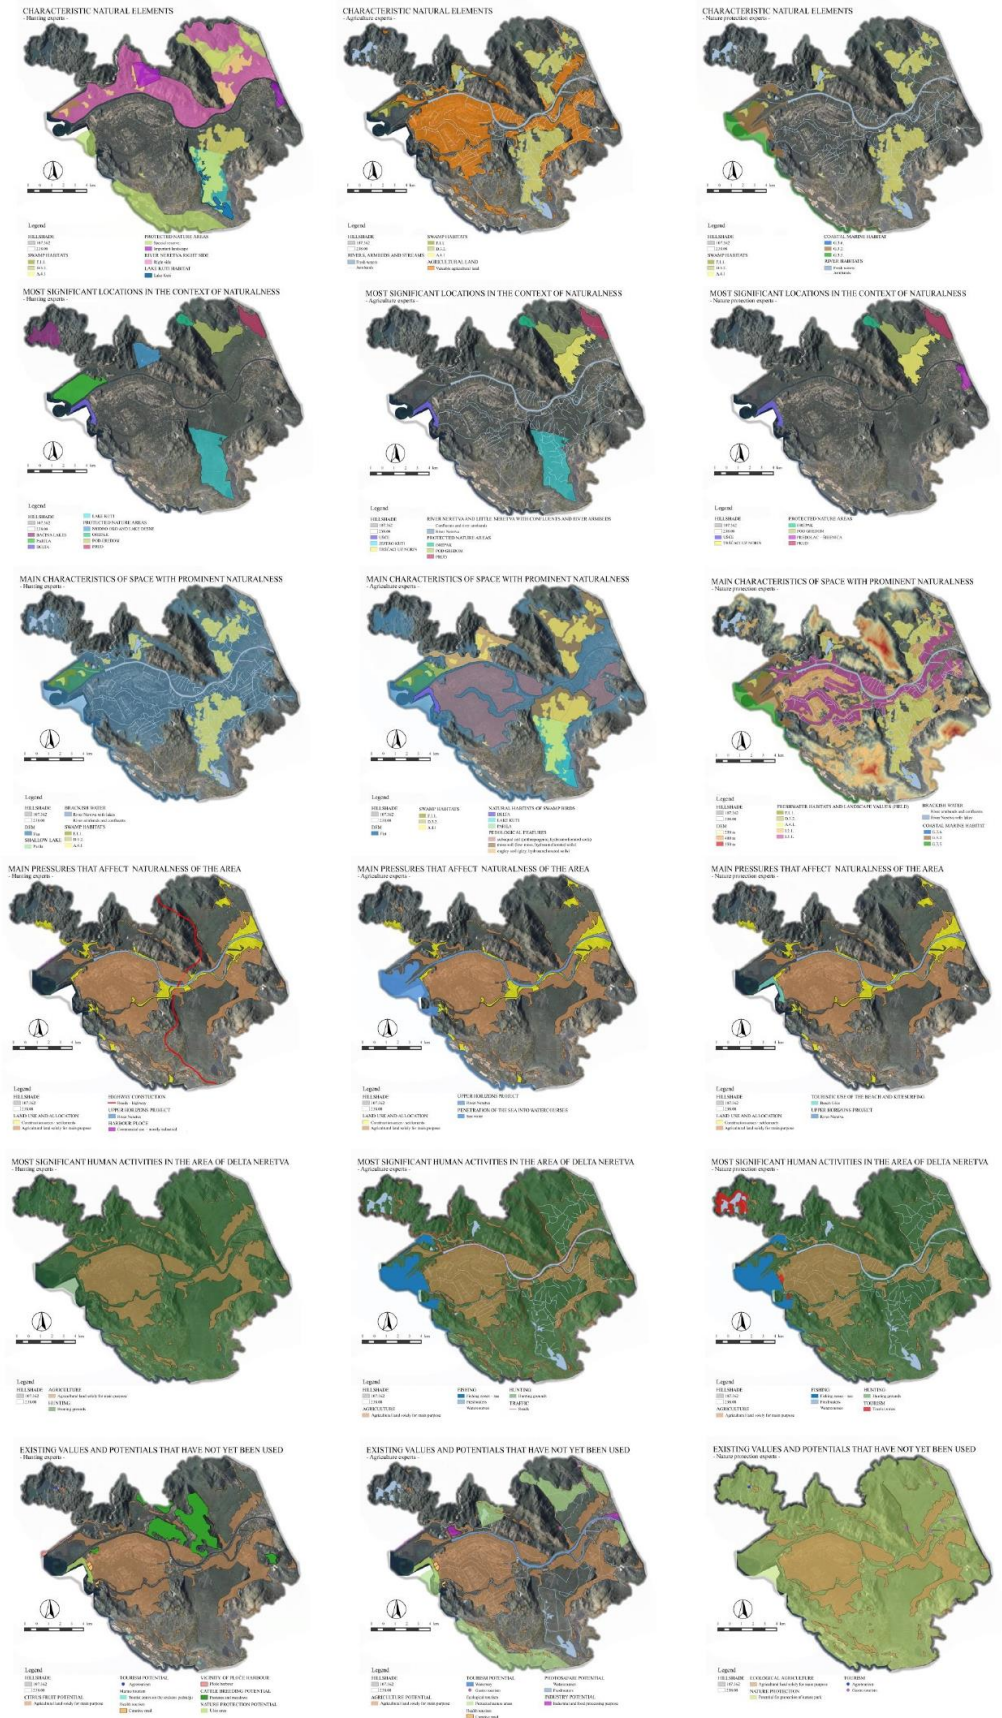

**Table S1.** Criteria for modeling perception of natural qualities.

| Model of perception<br>of natural qualities                     | Value     |          |         |        |             | Weight factor |       |       |
|-----------------------------------------------------------------|-----------|----------|---------|--------|-------------|---------------|-------|-------|
|                                                                 | 1         | 2        | 3       | 4      | 5           | NP            | AGR   | H     |
| 1.Characteristic natural values                                 |           |          |         |        |             |               |       |       |
| Wetlands                                                        | 210-500m  | 160-210m | 60-160m | 10-60m | 0-10m       | 1.559         | 1.249 | 1.246 |
| Waters                                                          | 210-500m  | 160-210m | 60-160m | 10-60m | 0-10m       | 1.229         | -     | -     |
| Benthos                                                         | 210-500m  | 160-210m | 60-160m | 10-60m | 0-10m       | 1.212         | -     | -     |
| Areas of nature protection                                      | 100-1000m | 50-100m  | 20-50m  | 10-20m | 0-10 m      | -             | -     | 1.246 |
| Kuti lake                                                       | 210-500m  | 160-210m | 60-160m | 10-60m | 0-10m       | -             | -     | 1.319 |
| Right side of Neretva river                                     | 210-500m  | 160-210m | 60-160m | 10-60m | 0-10m       | -             | -     | 1.190 |
| Surface Waters                                                  | 210-500m  | 160-210m | 60-160m | 10-60m | 0-10m       | -             | 1.335 | -     |
| Area for Nature park                                            |           |          |         |        | entire area | -             | 1.208 | -     |
| Soil quality                                                    |           |          |         |        | valuable    | -             | 1.208 | -     |
| 2. The most significant locations in the context of naturalness |           |          |         |        |             |               |       |       |
| Areas of nature protection                                      | 100-1000m | 50-100m  | 20-50m  | 10-20m | 0-10 m      | 1.161         | -     | -     |
| Reeds next to Norin                                             | 210-500m  | 160-210m | 60-160m | 10-60m | 0-10m       | 1.161         | 1.177 | -     |
| The mouth of the Neretva (Ušće)                                 | 210-500m  | 160-210m | 60-160m | 10-60m | 0-10m       | 1.231         | 1.326 | 1.095 |
| Forest park with cave Predolac                                  | 100-1000m | 50-100m  | 20-50m  | 10-20m | 0-10 m      | 1.125         | -     | -     |
| Omithological reserve Pod Grede                                 | 210-500m  | 160-210m | 60-160m | 10-60m | 0-10m       | -             | -     | 1.11  |
| Omithological reserve Prud                                      | 210-500m  | 160-210m | 60-160m | 10-60m | 0-10m       | -             | -     | 1.105 |
| Omithological reserve Orepak                                    | 210-500m  | 160-210m | 60-160m | 10-60m | 0-10m       | -             | -     | 1.11  |
| Significant landscape Blue Eye and Desne Lake                   | 100-1000m | 50-100m  | 20-50m  | 10-20m | 0-10 m      | -             | -     | 1.08  |
| Kuti lake                                                       | 210-500m  | 160-210m | 60-160m | 10-60m | 0-10m       | -             | 1.133 | 1.189 |
| Baćina lakes                                                    | 210-500m  | 160-210m | 60-160m | 10-60m | 0-10m       | -             | -     | 1.095 |
| Omithological reserve Parila                                    | 210-500m  | 160-210m | 60-160m | 10-60m | 0-10m       | -             | -     | 1.218 |
| Area Vid Norin                                                  | 100-1000m | 50-100m  | 20-50m  | 10-20m | 0-10 m      | -             | 1.177 | -     |
| Surface Waters                                                  | 210-500m  | 160-210m | 60-160m | 10-60m | 0-10m       | -             | 1.188 | -     |

**Figure S2.** Modeling perception of natural qualities – Submodel 1 – characteristic natural values.

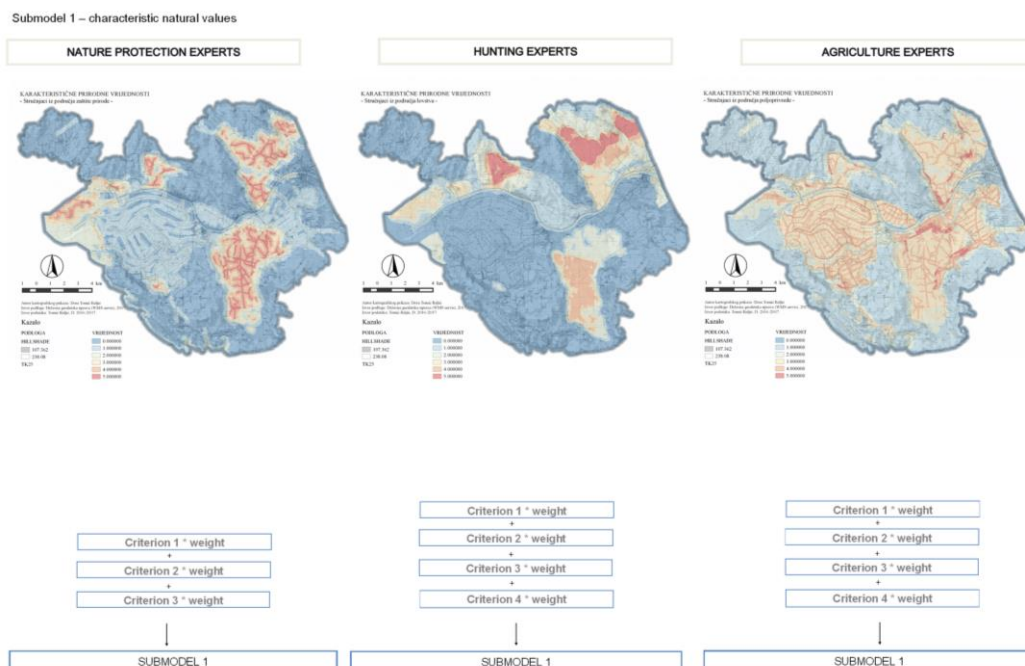

**Figure S3.** Modeling perception of natural qualities – Submodel 2 – the most significant locations in the context of naturalness.

Submodel 2 – the most significant locations in the context of naturalness

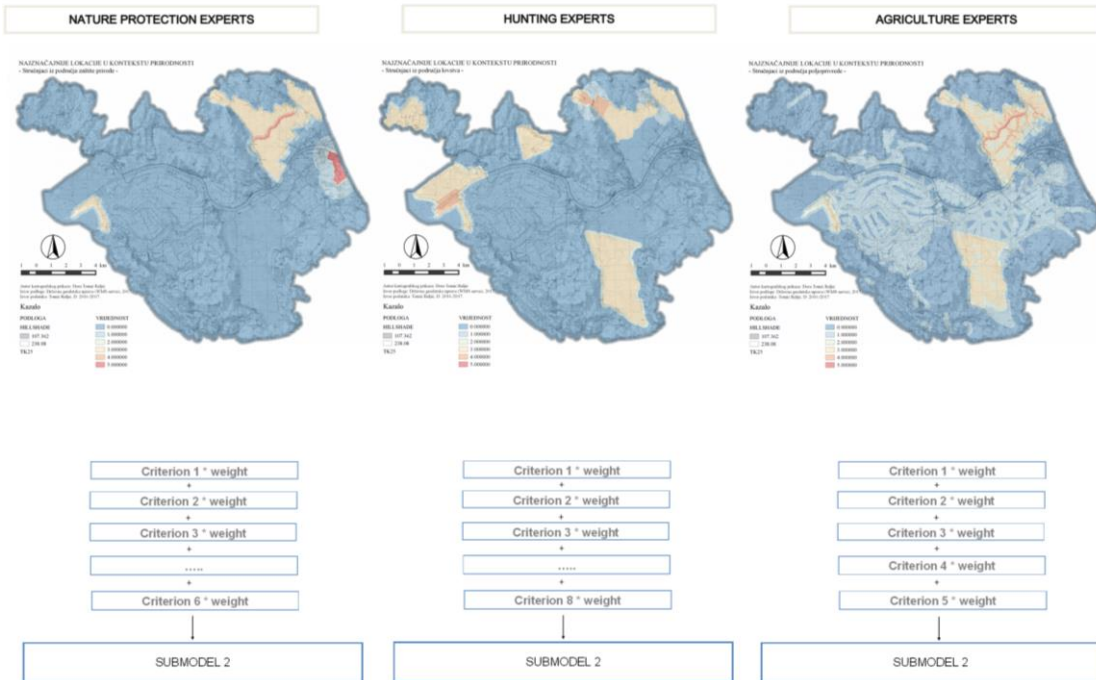

**Figure S4.** Modeling perception of natural qualities – Submodel 3 – basic characteristics of areas with outstanding naturalness.

Submodel 3 – basic characteristics of areas with outstanding naturalness

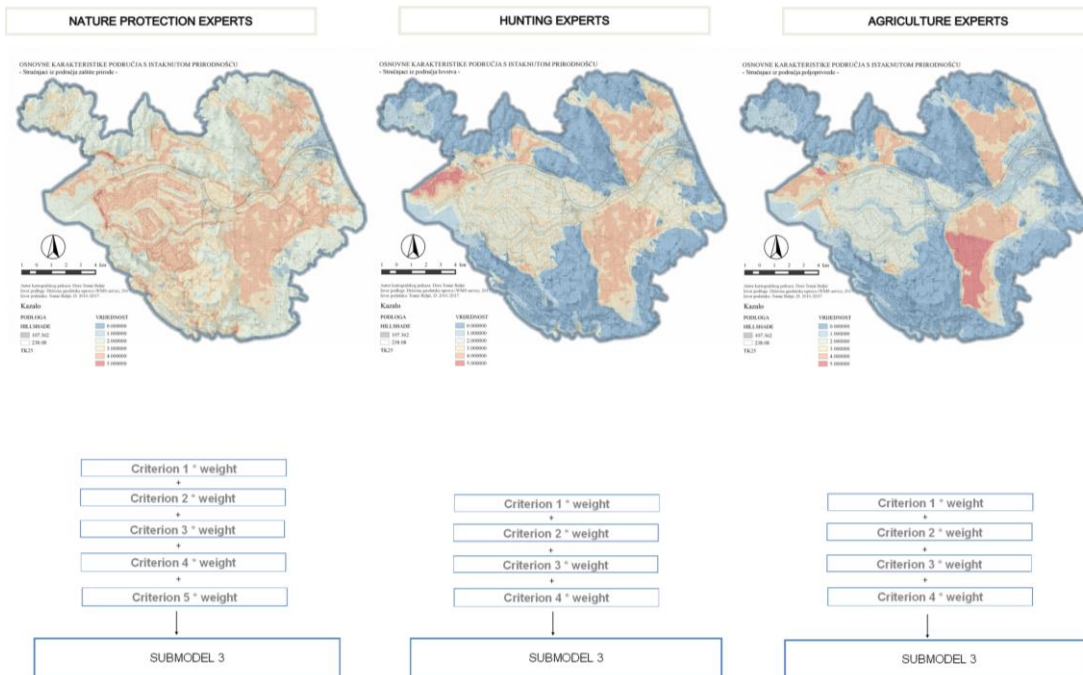





**Table S2.** Criteria for modeling perception of landscape potential for development.

| Model of perception<br>landscape potential<br>for development       | Value       |            |           |          |                                  | Weight factor |       |       |
|---------------------------------------------------------------------|-------------|------------|-----------|----------|----------------------------------|---------------|-------|-------|
|                                                                     | 1           | 2          | 3         | 4        | 5                                | NP            | AGR   | H     |
| 1. The most important human activities in the area of Neretva delta |             |            |           |          |                                  |               |       |       |
| Agricultural land                                                   | 50-100m     | 30-50m     | 20-30m    | 10-20m   | 0-10m                            | 1.507         | 1.557 | 1.663 |
| Touristic zones                                                     | 200-300m    | 150-200m   | 100-150m  | 50-100m  | 0-50m                            | 1.186         | -     | -     |
| Fishing zones                                                       | 40-50m      | 30-40m     | 20-30m    | 10-20m   | 0-10m                            | 1.307         | 1.325 | -     |
| Hunting areas                                                       |             |            |           |          | State and common hunting grounds | 1.307         | 1.325 | 1.337 |
| Traffic                                                             | 40-50m      | 30-40m     | 20-30m    | 10-20m   | 0-10m                            | -             | 1.118 | -     |
| 2. Unused existing values and potentials                            |             |            |           |          |                                  |               |       |       |
| Ecological agriculture                                              | 50-100m     | 30-50m     | 20-30m    | 10-20m   | 0-10 m                           | 1.169         | 1.15  | -     |
| Agrotourism                                                         | 500-1000m   | 300-500m   | 200-300m  | 100-200m | 0-100m                           | 1.181         | -     | 1.151 |
| Gastrotourism                                                       | 5000-10000m | 1000-5000m | 500-1000m | 200-500m | 0-200m                           | 1.154         | 1.128 | -     |
| Nature park                                                         |             |            |           |          | Whole area                       | 1.496         | -     | -     |
| Citrus cultivation                                                  | 50-100m     | 30-50m     | 20-30m    | 10-20m   | 0-10 m                           | -             |       | 1.175 |
| Health Tourism                                                      | 500-1000m   | 300-500m   | 200-300m  | 100-200m | 0-100m                           | -             | 1.128 | 1.124 |
| Maritime tourism                                                    | 500-1000m   | 300-500m   | 200-300m  | 100-200m | 0-100m                           | -             | -     | 1.124 |
| Protection of Mouth of Neretva (Ušće)                               | 210-500m    | 160-210m   | 60-160m   | 10-60m   | 0-10m                            | -             | -     | 1.148 |
| Port of Ploče                                                       | 1000-5000m  | 500-1000m  | 200-500m  | 100-200m | 0-100m                           | -             | -     | 1.150 |
| Cattle breeding (pastures)                                          | 50-100m     | 30-50m     | 20-30m    | 10-20m   | 0-10 m                           | -             | -     | 1.128 |
| Hunting                                                             |             |            |           |          | State and common hunting grounds | -             | 1.121 | -     |
| Nature protection                                                   | 500-1000m   | 300-500m   | 200-300m  | 100-200m | 0-100m                           | -             | 1.128 | -     |
| River photo safari                                                  | 40-50m      | 30-40m     | 20-30m    | 10-20m   | 0-10m                            | -             | 1.121 | -     |
| Industry                                                            | 50-100m     | 30-50m     | 20-30m    | 10-20m   | 0-10 m                           | -             | 1.098 | -     |
| Waterway                                                            | 40-50m      | 30-40m     | 20-30m    | 10-20m   | 0-10m                            | -             | 1.125 | -     |

**Figure S6.** Modeling perception of landscape potential for development - Submodel 1 – the most important human activities in the area of the Neretva delta.

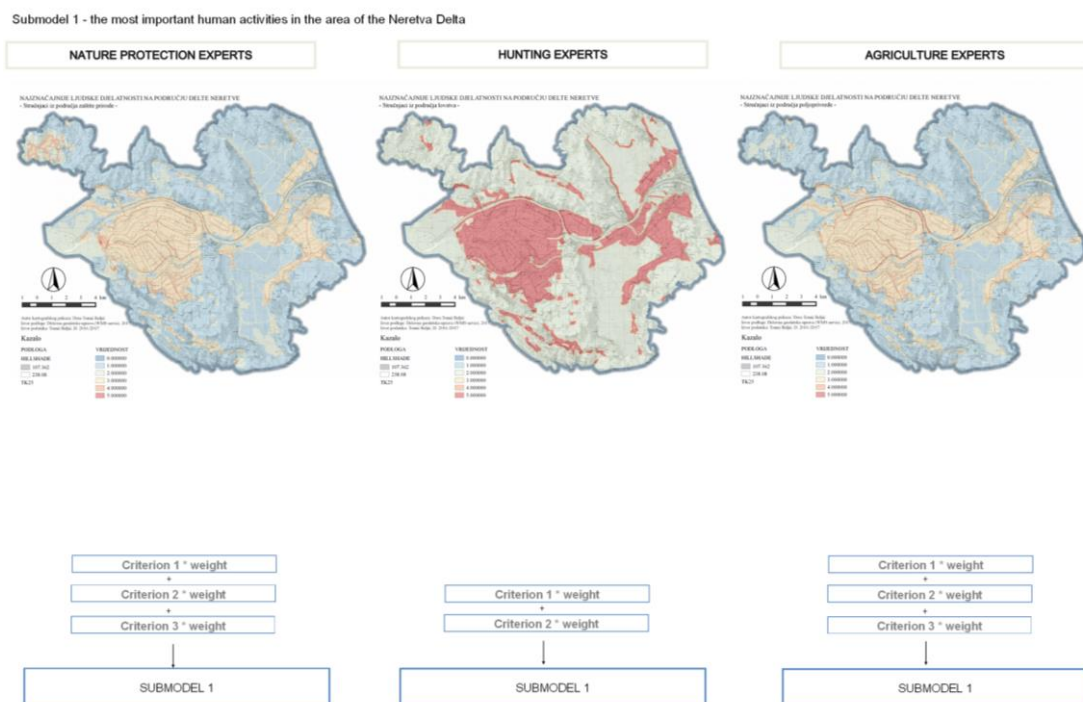



**Figure S7.** Modeling perception of landscape potential for development – Submodel 2 – unused existing values and potentials.

### Submodel 2 - Unused existing values and potentials

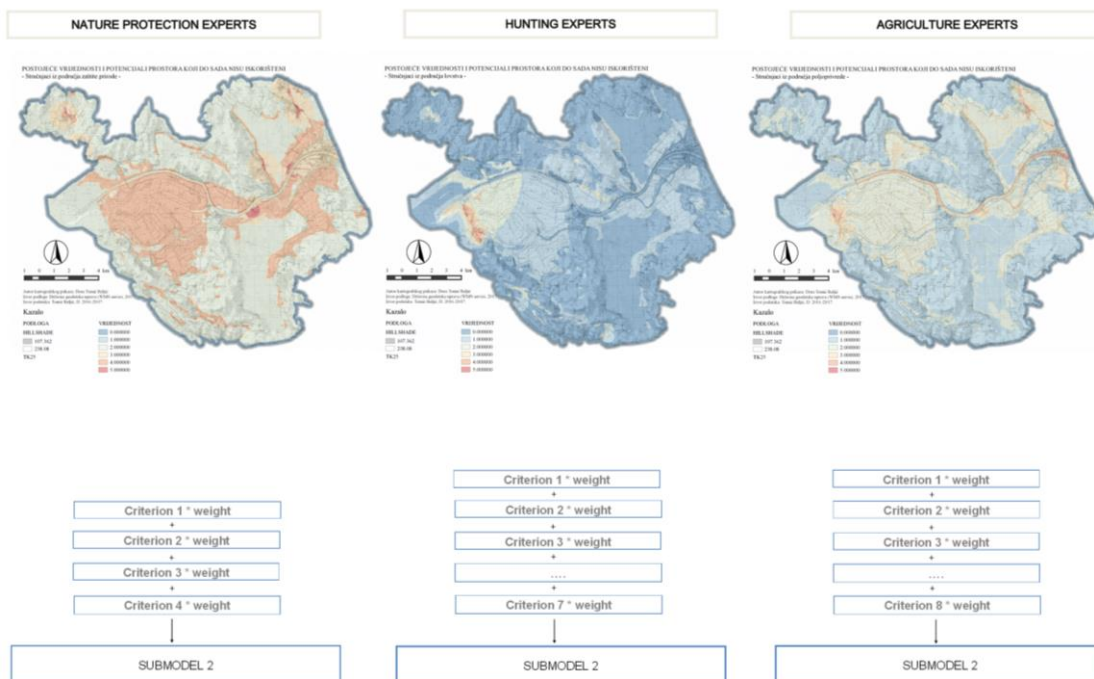

Supplement: s1 [file s1]
